# Supplementary material for: Graphitic carbon nitrides as platforms for single-atom photocatalysis
Source: Royal Society of Chemistry journal article supplement (doi:10.1039/c9fd00112c), 2019-12-23
Supplement: c9fd00112c3.pdf [file c9fd00112c3.pdf]

## SUPPLEMENTARY MATERIAL

### Graphitic Carbon Nitrides as Platforms for Single-Atom Photocatalysis

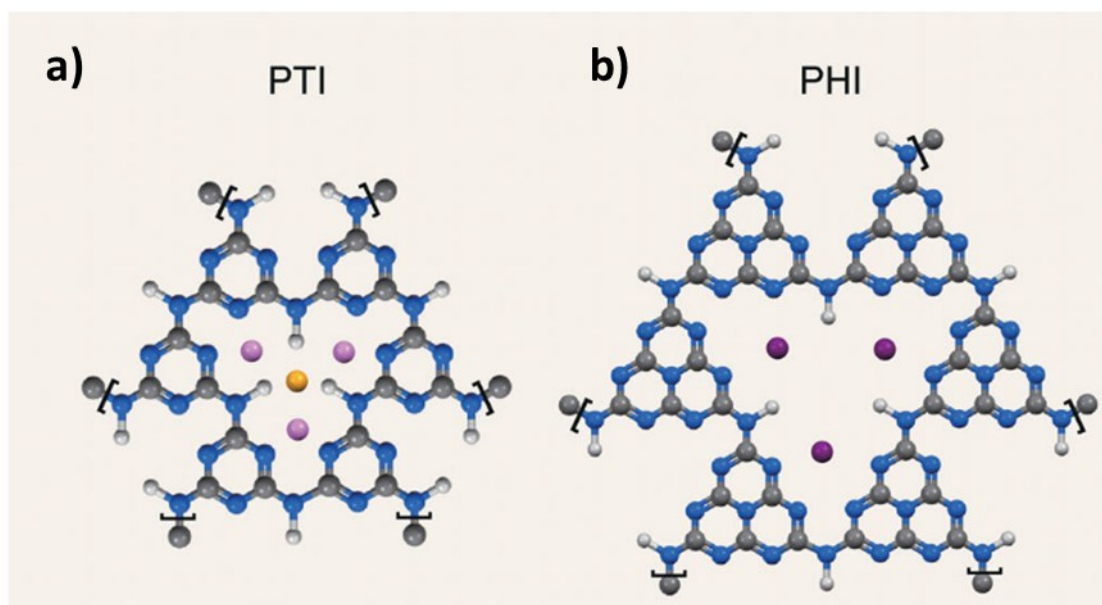

**Figure S1.** Idealized structure of a) PTI and b) PHI reproduced from ref. 3. Grey (C), blue (N), white (H), pink (Li), yellow (Cl) and purple (Na).

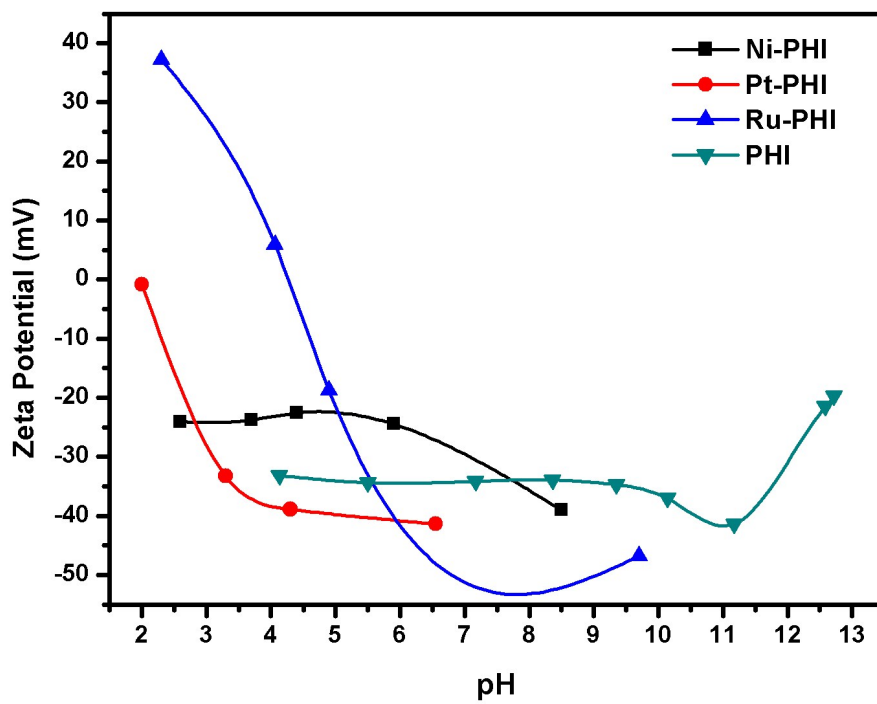

**Figure S2.** Zeta potential for the samples PHI, Pt-PHI, Ru-PHI and Ni-PHI.
